# Supplementary material
Source: PubMed Central journal article supplement (PMC3353097)

# **A Physics-Based Approach of Coarse-Graining the Cytoplasm of *Escherichia coli* (CGCYTO)**

Qian Wang and Margaret S. Cheung

Department of Physics, University of Houston, Houston, Texas

## **Supporting Material**

Method:

### 1. Clustering Method

Given a macromolecule, an atom  $i$  with coordinate of  $x_i$  is assigned into one of the clusters in iterative steps and there are  $C_1, C_2 \dots C_N$  clusters. In the initial step,  $N$  is the number of atoms in a macromolecule and  $N$  may vary after each iteration. A cluster  $l$  has  $T$  atoms. The geometric center of  $C_l$  is  $C_l = \frac{1}{l} \sum_{j=1}^l x_j$ . In each iteration, a given atom  $i$  is assigned to cluster  $l$  if

the Euclidean distance between  $x_i$  and the geometric center of the  $l$ th cluster  $C_l$  is less than  $D$  followed by an updated on  $C_l$  accordingly. All atoms are clustered iteratively into  $N$  clusters until there is no additional assignment of atoms among these clusters as  $C_l [l=1 \dots N]$  converges.

### 2. Potential energy of coarse-grained macromolecular crowders

In order to maintain the shape of these macromolecular crowders in the simulation, bond strength, bond angle and dihedral energy were used.

The bond strength between bead  $i$  and bead  $j$  follows the formula below:

$$E_{ij}^{bond} = k_b (r_{ij} - r_{ij}^0)^2 \quad (S1)$$

$k_b = 250$  kcal/mol. If bead  $i$  and  $j$  represent all-atomistic clusters A and B, respectively, then  $r_{ij}^0$  is the distance between the geometry center of A and the geometry center of B.

The bond angle among three consecutive beads  $i, j$  and  $k$  has the following form:

$$E_{ijk}^{angle} = k_\theta (\theta_{ijk} - \theta_{ijk}^0)^2 \quad (S2)$$

$k_\theta = 250$  kcal/mol. If bead  $i, j$  and  $k$  represent all-atomistic clusters A, B and C, respectively, then  $\theta_{ijk}^0$  is the angle among the geometry center of A, geometry center of B and geometry center of C.

The dihedral energy for four consecutive beads  $i, j, k$ , and  $l$  has the following form:

$$E_{ijkl}^{dihedral} = \sum_{n=1,3} k_\varphi^n [1 - \cos(n \times (\varphi_{ijkl} - \varphi_{ijkl}^0))] \quad (S3)$$

$k_\varphi^1 = 1.2$  kcal/mol and  $k_\varphi^3 = 0.6$  kcal/mol. If  $i, j, k$  and  $l$  represent all-atomistic clusters A, B, C and D, respectively, then  $\varphi_{ijkl}^0$  is the dihedral angle among the geometry center of A, geometry center of B, geometry center of C and geometry center of D.

### 3. Folding free energy calculation by the Scaled Particle Theory (SPT)

An analytical solution of the folding free energy difference ( $\Delta\Delta G_{uf}$ ) between the bulk and crowded conditions is computed by the SPT with a mixture of spherical crowders. We have used two methods developed by Minton or Zhou: 1)  $\Delta\Delta G_{uf}$  (SPT-Minton) satisfies the following formula [1],

$$\begin{aligned} \Delta\Delta G_{uf} = & (1-\varphi)^{-1} \sum_i \varphi_i (3f_i + 3f_i^2 + f_i^3) + (1-\varphi)^{-2} \sum_i \varphi_i f_i \sum_i \varphi_i (9f_i/2 + 3f_i^2) + 3(1-\varphi)^{-3} (\sum_i \varphi_i f_i)^3 \\ & - (1-\varphi)^{-1} \sum_i \varphi_i (3U_i + 3U_i^2 + U_i^3) + (1-\varphi)^{-2} \sum_i \varphi_i U_i \sum_i \varphi_i (9U_i/2 + 3U_i^2) + 3(1-\varphi)^{-3} (\sum_i \varphi_i U_i)^3 \end{aligned} \quad (S4)$$

$$f_i = \sqrt{5/3} R_g(\text{fold}) / r_i \quad (S5)$$

$$U_i = \sqrt{5/3} R_g(\text{unfold}) / r_i \quad (S6)$$

2)  $\Delta\Delta G_{uf}$  (SPT-Zhou) satisfies the following formula [2],

$$\begin{aligned} \Delta\Delta G_{uf} = & (1-\varphi)^{-1} \sum_i \varphi_i (3f_i + 3f_i^2 + f_i^3) + (1-\varphi)^{-2} \sum_i \varphi_i f_i \sum_i \varphi_i (9f_i/2 + 3f_i^2) + 3(1-\varphi)^{-3} (\sum_i \varphi_i f_i)^3 \\ & - 3 \sum_i \varphi_i U_i^2 (1 + 2/\sqrt{\pi} U_i) - 9 \sum_{i,j} \varphi_i \varphi_j U_i U_j \ln(U_{i,j}) \end{aligned} \quad (S7)$$

$$f_i = R_g(\text{fold}) / r_i \quad (S8)$$

$$U_i = R_g(\text{unfold}) / r_i \quad (S9)$$

$\varphi_i$  is the volume of fraction of crowdors for the  $i$ th type of crowder with radius  $r_i$ .  $i$  ranges from 1 to 50.  $R_g(\text{fold})$  is the radius of gyration of apoazurin in the folded state and  $R_g(\text{unfold})$  is the radius of gyration of apoazurin in the unfolded state. In this work,  $R_g(\text{fold}) = 15.1\text{\AA}$  and  $R_g(\text{unfold}) = 35.1\text{\AA}$ . These values were obtained from our coarse-grained molecular simulation at  $1.32k_B T/\epsilon$ , the folding temperature  $T_f$  of apoazurin in the bulk condition.

#### 4. Coarse-grained modeling of a protein

A side chain  $C_\alpha$  model (SCM) [3] that includes two beads per amino acid (except glycine) was used to represent the structure of testing protein (apoazurin). The crystal structure of apoazurin was obtained from the Protein Data Bank (PDB:1E65). Apoazurin is a two-state fast folding protein in experiments[4]; therefore the use of structural-based model is adequate for modeling the folding of apoazurin. A detailed description of the structure-based (Go-type[5]) Hamiltonian can be found in a previous study[6]. Apoazurin was placed in a periodic cubic box and the length of the box is  $1140\text{\AA}$ . Crowder models were randomly assigned into the box. In addition, considering the heterogeneity of the crowdors in the HS and PD model, 10 independent simulations were each performed where an apoazurin protein was randomly inserted into ten different void positions in a cytoplasmic model.

#### 5. Computation of the local volume available for apoazurin in the presence of crowdors

A void is formed by the fluctuation of particles in a crowded system. We computed a parameter, named ‘‘local free volume’’  $\langle LV_{\text{free}} \rangle$  that measures the size of such void available to an apoazurin in a crowded medium.  $\langle LV_{\text{free}} \rangle$  is computed by the particle insertion method of Widom [7] shown in Figure S1: First, in a crowded solution, a defined sphere  $Z_A$  with radius of  $114\text{\AA}$  is centered at the center of mass (COM) of an apoazurin. A hard sphere with a radius of

45.3Å (equals to  $\sqrt{5/3}$  times 35.1Å, the radius of gyration of apoazurin in the unfolded state [1]) is randomly inserted into  $Z_A$  for N times. Note that the radius of 45.3Å is the same value as the one we have used for the unfolded state in the abovementioned SPT calculations. An attempted insertion of a testing hard sphere is accepted only when its volume does not overlap with other crowders' in  $Z_A$ . Set volume of  $Z_A$  to be  $V=(4\pi/3)\times 114^3 \text{ \AA}^3$ . If an attempt of insertion is accepted for N' times, then  $\langle LV_{\text{free}} \rangle = N'V/N$ .  $\langle \rangle$  represents an ensemble average.

#### REFERENCE:

1. Minton, A.P., *Models for excluded volume interaction between an unfolded protein and rigid macromolecular cosolutes: Macromolecular crowding and protein stability revisited* Biophys. J., 2005. **88**: p. 971-985.
2. Zhou, H.-X., *Effect of mixed macromolecular crowding agents on protein folding*. Proteins, 2008. **72**: p. 1109-1113.
3. Cheung, M.S., et al., *Exploring the interplay of topology and secondary structural formation in the protein folding problem*. J. Phys. Chem. B, 2003. **107**: p. 11193-11200.
4. Chen, M., et al., *Correlation between protein stability cores and protein folding kinetics: a case study on Pseudomonas aeruginosa apoazurin*. Structure, 2006. **14**: p. 1401-1410.
5. Taketomi, H., Y. Ueda, and N. Go, *Studies on Protein Folding, Unfolding and Fluctuations by Computer-Simulation .1. Effect of Specific Amino-Acid Sequence Represented by Specific Inter-Unit Interactions*. Int J Pept Protein Res, 1975. **7**: p. 445-459.
6. Christiansen, A., et al., *Factors defining effects of macromolecular crowding on protein stability: an in vitro/in silico case study using cytochrome c*. Biochemistry, 2010. **49**: p. 6519-6530.
7. Widom, B., *Some topics in the theory of fluids*. J. Chem. Phys., 1963. **39**: p. 2808-2812.
8. Chodera, J.D., et al., *Use of the weighted histogram analysis method for the analysis of simulated and parallel tempering simulations*. J. Chem. Theory Comput., 2007. **3**: p. 26-41.

Table S1. Structural characteristics for 50 kinds of macromolecules. See the definitions of  $V_p$ ,  $R_{eff}$ ,  $\Delta$ ,  $S$ ,  $V_{co-macro}$ ,  $V_{co-sphere}$ , and  $\lambda$  in the Method Section.

| Name     | $V_p$ ( $\text{\AA}^3$ ) | $R_{eff}$ ( $\text{\AA}$ ) | $\Delta$ | $S$   | $V_{co-macro}$ ( $\text{\AA}^3$ ) | $V_{co-sphere}$ ( $\text{\AA}^3$ ) | $\lambda$ |
|----------|--------------------------|----------------------------|----------|-------|-----------------------------------|------------------------------------|-----------|
| Ppa      | 223386                   | 37.6                       | 0        | 0     | 624901                            | 576847.57                          | 0.92      |
| GapA     | 268037                   | 40                         | 0        | 0     | 739953                            | 659501                             | 0.89      |
| Adk      | 44674                    | 22                         | 0.02     | 0     | 214224                            | 195624.49                          | 0.91      |
| Pyr      | 641323                   | 53.5                       | 0.02     | -0.01 | 1488390                           | 1288078                            | 0.87      |
| CspC     | 13928                    | 14.9                       | 0.02     | -0    | 110300                            | 101376.82                          | 0.92      |
| Pnp      | 414100                   | 46.2                       | 0.02     | -0.01 | 1023966                           | 915620.37                          | 0.89      |
| GlnA     | 1194339                  | 65.8                       | 0.02     | -0.01 | 2455160                           | 2130077.5                          | 0.87      |
| PpiB     | 32695                    | 19.8                       | 0.03     | 0.01  | 176464                            | 162272.12                          | 0.92      |
| 50S      | 2658992                  | 85.9                       | 0.04     | -0.01 | 5059822                           | 4181607.1                          | 0.83      |
| Bcp      | 22962                    | 17.6                       | 0.05     | 0     | 145825                            | 132580.04                          | 0.91      |
| PurA     | 177861                   | 34.9                       | 0.05     | 0.03  | 541574                            | 489406.74                          | 0.9       |
| TufA     | 170376                   | 34.4                       | 0.06     | -0.02 | 547255                            | 474648.72                          | 0.87      |
| DapA     | 241746                   | 38.6                       | 0.06     | -0    | 670665                            | 611157.97                          | 0.91      |
| Mop      | 1969190                  | 77.8                       | 0.06     | 0.03  | 3870926                           | 3235861.1                          | 0.84      |
| Eno      | 164550                   | 34                         | 0.08     | 0.03  | 508275                            | 463075.17                          | 0.91      |
| DnaK     | 79355                    | 26.7                       | 0.08     | 0     | 320937                            | 281532.77                          | 0.88      |
| Rpo      | 618409                   | 52.9                       | 0.09     | 0.05  | 1559367                           | 1251510                            | 0.8       |
| CysK     | 120284                   | 30.6                       | 0.09     | 0.02  | 427388                            | 372176.36                          | 0.87      |
| Hns      | 10929                    | 13.8                       | 0.1      | 0.02  | 100860                            | 89673.279                          | 0.89      |
| Hup      | 29059                    | 19.1                       | 0.1      | 0.02  | 173491                            | 151520.83                          | 0.87      |
| MetE     | 166072                   | 34.1                       | 0.12     | 0.07  | 533884                            | 466106.23                          | 0.87      |
| SodA     | 85575                    | 27.3                       | 0.13     | 0.08  | 333185                            | 295875.91                          | 0.89      |
| GlyA     | 155914                   | 33.4                       | 0.13     | 0.09  | 494315                            | 445771.06                          | 0.9       |
| IcdA     | 170979                   | 34.4                       | 0.14     | 0.11  | 543143                            | 475842.19                          | 0.88      |
| PanB     | 265733                   | 39.9                       | 0.15     | -0.11 | 786045                            | 655298.71                          | 0.83      |
| IlvC     | 96004                    | 28.4                       | 0.15     | 0.11  | 360161                            | 319411.9                           | 0.89      |
| SerC     | 146045                   | 32.7                       | 0.16     | 0.11  | 480139                            | 425762.88                          | 0.89      |
| SodB.pqr | 78262                    | 26.5                       | 0.16     | 0.11  | 323602                            | 278986.25                          | 0.86      |
| AhpC     | 361605                   | 44.2                       | 0.17     | -0.14 | 1098769                           | 825592.85                          | 0.75      |
| 30S      | 1458112                  | 70.3                       | 0.21     | 0.13  | 3107966                           | 2513442.5                          | 0.81      |
| Mdh      | 119180                   | 30.5                       | 0.21     | 0.17  | 422320                            | 369829.89                          | 0.88      |
| GpmA     | 105080                   | 29.3                       | 0.23     | 0.19  | 394194                            | 339437.7                           | 0.86      |
| Suc      | 268156                   | 40                         | 0.23     | 0.22  | 774916                            | 659717.88                          | 0.85      |
| tRNA-GLN | 41655                    | 21.5                       | 0.25     | 0.08  | 256529                            | 187470.72                          | 0.73      |

|          |        |      |      |      |        |           |      |
|----------|--------|------|------|------|--------|-----------|------|
| UspA     | 60387  | 24.3 | 0.25 | 0.24 | 268088 | 236035.57 | 0.88 |
| Pgk      | 78587  | 26.6 | 0.26 | 0.26 | 322216 | 279744.3  | 0.87 |
| TpiA     | 97232  | 28.5 | 0.27 | 0.27 | 370077 | 322144.85 | 0.87 |
| Upp      | 93186  | 28.1 | 0.28 | 0.22 | 366016 | 313110.99 | 0.86 |
| Fba      | 145047 | 32.6 | 0.28 | 0.28 | 493950 | 423724.82 | 0.86 |
| Asd      | 146291 | 32.7 | 0.29 | 0.3  | 486382 | 426264.81 | 0.88 |
| GltD     | 194358 | 35.9 | 0.3  | 0.26 | 621910 | 521525.91 | 0.84 |
| PurC     | 88909  | 27.7 | 0.31 | 0.33 | 366271 | 303466.26 | 0.83 |
| RpiA     | 82890  | 27   | 0.33 | 0.37 | 337562 | 289714.53 | 0.86 |
| tRNA-CYS | 42428  | 21.6 | 0.36 | 0.34 | 253484 | 189572.75 | 0.75 |
| FusA     | 144363 | 32.5 | 0.37 | 0.44 | 525571 | 422326.38 | 0.8  |
| tRNA-PHE | 44208  | 21.9 | 0.37 | 0.36 | 259957 | 194375.51 | 0.75 |
| Tig      | 119772 | 30.6 | 0.38 | 0.47 | 503876 | 371088.71 | 0.74 |
| Efp      | 41367  | 21.5 | 0.39 | 0.42 | 246304 | 186684.94 | 0.76 |
| Tsf      | 131649 | 31.6 | 0.52 | 0.7  | 539382 | 396080.3  | 0.73 |
| Frr      | 39978  | 21.2 | 0.71 | 1.18 | 245654 | 182874.7  | 0.74 |

Table S2. Structural characteristics of partitioned spheres for a macromolecule that cannot be modeled as a single hard sphere. See the definition of  $R_{eff}$ ,  $\Delta$ ,  $S$ ,  $\lambda$ , and  $\lambda'$  in the Method section.

| Name      | $\Delta$ | $S$  | $R_{eff}$ (Å) | $\lambda$ | $\lambda'$ |
|-----------|----------|------|---------------|-----------|------------|
| tRNA-GLN  | 0.25     | 0.08 | 21.5          | 0.73      | 0.95       |
| Bead 1    | 0.06     | 0.03 | 10.5          | 0.9       |            |
| Bead 2    | 0.23     | 0.02 | 8.6           | 0.84      |            |
| Bead 3    | 0.1      | -0.1 | 16.3          | 0.91      |            |
| Bead 4    | 0.24     | 0.22 | 15.1          | 0.86      |            |
| UspA      | 0.25     | 0.24 | 24.3          | 0.88      | 0.92       |
| Bead 1    | 0.02     | 0    | 18.9          | 0.9       |            |
| Bead 2    | 0.03     | 0    | 19.7          | 0.92      |            |
| Pgk       | 0.26     | 0.26 | 26.6          | 0.87      | 0.93       |
| Bead 1    | 0.02     | 0    | 20.8          | 0.92      |            |
| Bead 2    | 0.09     | 0.01 | 20.8          | 0.91      |            |
| TpiA      | 0.27     | 0.27 | 28.5          | 0.87      | 0.94       |
| Bead 1, 2 | 0.04     | 0.01 | 22.6          | 0.92      |            |
| Upp       | 0.28     | 0.22 | 28.1          | 0.86      | 0.90       |
| Bead 1, 2 | 0.07     | 0.01 | 22.1          | 0.9       |            |
| Fba       | 0.28     | 0.28 | 32.6          | 0.86      | 0.91       |
| Bead 1, 2 | 0.03     | 0    | 25.9          | 0.89      |            |
| Asd       | 0.29     | 0.3  | 32.7          | 0.88      | 0.93       |
| Bead 1, 2 | 0.06     | 0    | 26.1          | 0.89      |            |
| GltD      | 0.3      | 0.26 | 35.9          | 0.84      | 0.92       |
| Bead 1    | 0.09     | 0.03 | 25.5          | 0.88      |            |
| Bead 2    | 0.17     | 0.13 | 23            | 0.9       |            |
| Bead 3    | 0.09     | 0.04 | 25.4          | 0.89      |            |
| PurC      | 0.31     | 0.33 | 27.7          | 0.83      | 0.91       |
| Bead 1, 2 | 0.08     | -0   | 22.1          | 0.88      |            |
| RpiA      | 0.33     | 0.37 | 27            | 0.86      | 0.94       |
| Bead 1    | 0.06     | 0    | 21.5          | 0.9       |            |
| Bead 2    | 0.05     | 0    | 21.6          | 0.9       |            |
| tRNA-CYS  | 0.36     | 0.34 | 21.6          | 0.75      | 0.94       |
| Bead 1    | 0.22     | 0.18 | 13.7          | 0.82      |            |
| Bead 2    | 0.12     | 0    | 16.2          | 0.89      |            |
| Bead 3    | 0.21     | 0.18 | 14.5          | 0.9       |            |
| FusA      | 0.37     | 0.44 | 32.5          | 0.8       | 0.90       |
| Bead 1    | 0.11     | 0.06 | 27.2          | 0.86      |            |
| Bead 2    | 0.15     | 0.08 | 24.6          | 0.8       |            |
| tRNA-PHE  | 0.37     | 0.36 | 21.9          | 0.75      | 0.95       |

|      |                |      |      |      |      |      |
|------|----------------|------|------|------|------|------|
|      | Bead 1         | 0.24 | 0.21 | 13.6 | 0.81 |      |
|      | Bead 2         | 0.1  | 0.03 | 16.2 | 0.91 |      |
|      | Bead 3         | 0.25 | 0.22 | 15.2 | 0.88 |      |
| Tig  |                | 0.38 | 0.47 | 30.6 | 0.74 | 0.92 |
|      | Bead 1         | 0.11 | 0.04 | 14.4 | 0.89 |      |
|      | Bead 2         | 0.12 | -0   | 14   | 0.89 |      |
|      | Bead 3         | 0.03 | -0   | 22.9 | 0.85 |      |
|      | Bead 4         | 0.12 | -0.1 | 14.2 | 0.85 |      |
|      | Bead 5         | 0.2  | 0.17 | 16.3 | 0.9  |      |
| Efp  |                | 0.39 | 0.42 | 21.5 | 0.76 | 0.93 |
|      | Bead 1         | 0.18 | 0.11 | 14.8 | 0.87 |      |
|      | Bead 2         | 0.01 | 0    | 15   | 0.91 |      |
|      | Bead 3         | 0.14 | 0.1  | 14.2 | 0.89 |      |
| Tsf  |                | 0.52 | 0.7  | 31.6 | 0.73 | 0.86 |
|      | Bead 1         | 0.21 | 0.1  | 21.7 | 0.8  |      |
|      | Bead 2         | 0.22 | 0.19 | 23.1 | 0.87 |      |
|      | Bead 3         | 0.17 | 0    | 20.4 | 0.81 |      |
| Frr  |                | 0.71 | 1.18 | 21.2 | 0.74 | 0.98 |
|      | Bead 1         | 0.14 | 0.1  | 14.5 | 0.9  |      |
|      | Bead 2         | 0.17 | 0.14 | 14.5 | 0.89 |      |
|      | Bead 3         | 0.08 | 0.04 | 15.2 | 0.92 |      |
| AhpC |                | 0.17 | -0.1 | 44.2 | 0.75 | 0.97 |
|      | Bead 1,2,3,4,5 | 0.16 | 0.1  | 25.9 | 0.89 |      |



Table S3. Composition of macromolecules for an *E. coli* cytoplasmic PD model. The second and the fifth columns are the number of partitioned beads for each macromolecular species. The third and the sixth columns are the number of macromolecules in the system.

| Name | # of beads | # of macromolecules | Name     | # of beads | # of macromolecules |
|------|------------|---------------------|----------|------------|---------------------|
| Ppa  | 1          | 25                  | IlvC     | 1          | 50                  |
| GapA | 1          | 28                  | SerC     | 1          | 31                  |
| Adk  | 1          | 39                  | SodB.pqr | 1          | 25                  |
| Pyr  | 1          | 8                   | AhpC     | 5          | 20                  |
| CspC | 1          | 202                 | 30S      | 1          | 28                  |
| Pnp  | 1          | 8                   | Mdh      | 1          | 36                  |
| GlnA | 1          | 3                   | GpmA     | 1          | 11                  |
| PpiB | 1          | 20                  | Suc      | 1          | 11                  |
| 50S  | 1          | 28                  | tRNA-GLN | 4          | 104                 |
| Bcp  | 1          | 22                  | UspA     | 2          | 20                  |
| PurA | 1          | 11                  | Pgk      | 2          | 73                  |
| TufA | 1          | 507                 | TpiA     | 2          | 14                  |
| DapA | 1          | 6                   | Upp      | 2          | 31                  |
| Mop  | 1          | 6                   | Fba      | 2          | 17                  |
| Eno  | 1          | 50                  | Asd      | 2          | 11                  |
| DnaK | 1          | 31                  | GltD     | 3          | 8                   |
| Rpo  | 1          | 11                  | PurC     | 2          | 20                  |
| CysK | 1          | 36                  | RpiA     | 2          | 8                   |
| Hns  | 1          | 20                  | tRNA-CYS | 3          | 104                 |
| PanB | 1          | 6                   | FusA     | 2          | 62                  |
| Hup  | 1          | 34                  | tRNA-PHE | 3          | 104                 |
| MetE | 1          | 596                 | Tig      | 5          | 25                  |
| SodA | 1          | 36                  | Efp      | 3          | 39                  |
| GlyA | 1          | 42                  | Tsf      | 3          | 34                  |
| IcdA | 1          | 120                 | Frr      | 3          | 20                  |

Table S4. Difference in the folding free energy ( $\Delta\Delta G_{\text{uf}}$ ) between the bulk and the crowded environment at several conditions at  $1.32 k_{\text{B}}T/\epsilon$  calculated by the coarse-grained molecular simulations and the scaled particle theory (SPT). See the definition of  $\Delta\Delta G_{\text{uf}}(\text{SPT-Minton})$  and  $\Delta\Delta G_{\text{uf}}(\text{SPT-Zhou})$  in the method section. The unit is in kcal/mol. The deviation of ( $\Delta\Delta G_{\text{uf}}$ ) in HS and PD models from 10 independent simulations is shown in the parentheses. The error bar for the simulation data of the HS and the PD model is calculated by the definition of the standard deviation divided by N samples and N=10. The error bar for the simulation data of the F70 model is calculated by the WHAM program[8].

|                                                 | F70,<br>$\phi_c=25\%$ | F70,<br>$\phi_c=32\%$ | F70,<br>$\phi_c=40\%$ | HS,<br>$\phi_c=32\%$ | PD, $\phi_c=32\%$    |
|-------------------------------------------------|-----------------------|-----------------------|-----------------------|----------------------|----------------------|
| $\Delta\Delta G_{\text{uf}}(\text{Simulation})$ | -1.34±0.08            | -1.87±0.09            | -3.25±0.07            | -5.22±0.13<br>(0.41) | -4.75±0.24<br>(0.76) |
| $\Delta\Delta G_{\text{uf}}(\text{SPT-Zhou})^*$ | -0.28                 | -0.31                 | -0.24                 | -1.48                | N/A                  |
| $\Delta\Delta G_{\text{uf}}(\text{SPT-Minton})$ | -2.15                 | -3.55                 | -5.78                 | -8.27                | N/A                  |

Figure S1. Illustration of the algorithm for the calculation of the local free volume (see the definition in the Method section) for a test protein apoazurin. The largest black circle represents a sphere of radius  $114\text{\AA}$ , the red circle represents the coarse-grained macromolecules and the blue circle with broken lines represents the two possible positions for a test bead upon an insertion process. The radius of the blue sphere is  $45.3\text{\AA}$ .

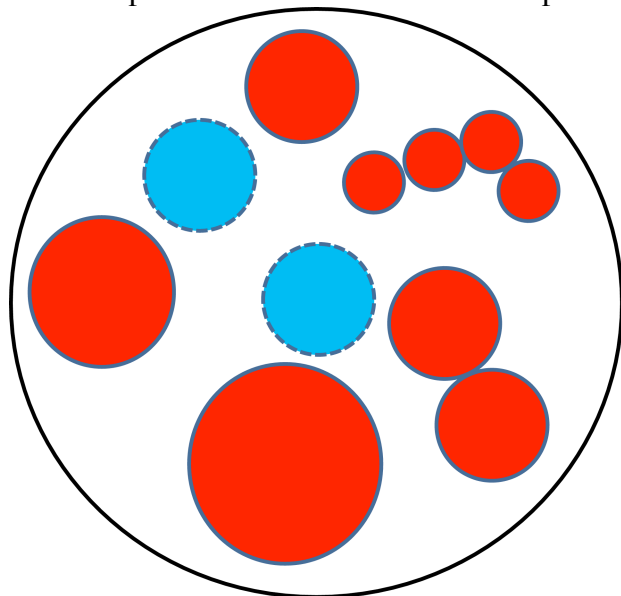

Figure S2. Radius of gyration of apoazurin as a function of temperature in the presence of cytoplasm made of (A) HS model and (B) PD model. For each model, apoazurin was randomly inserted into 10 different voids in the cytoplasm. 10 independent simulations were performed and each trajectory was represented by a curve in the figure.

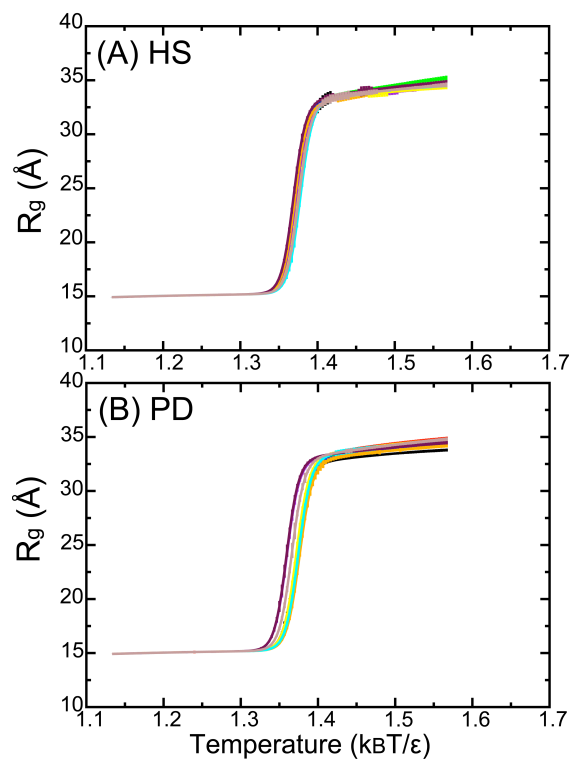

Figure S3. Distribution of the potential energy in replica exchange molecular dynamics simulations. Temperature ranges from  $1.13k_B T/\epsilon$  to  $1.57k_B T/\epsilon$ .

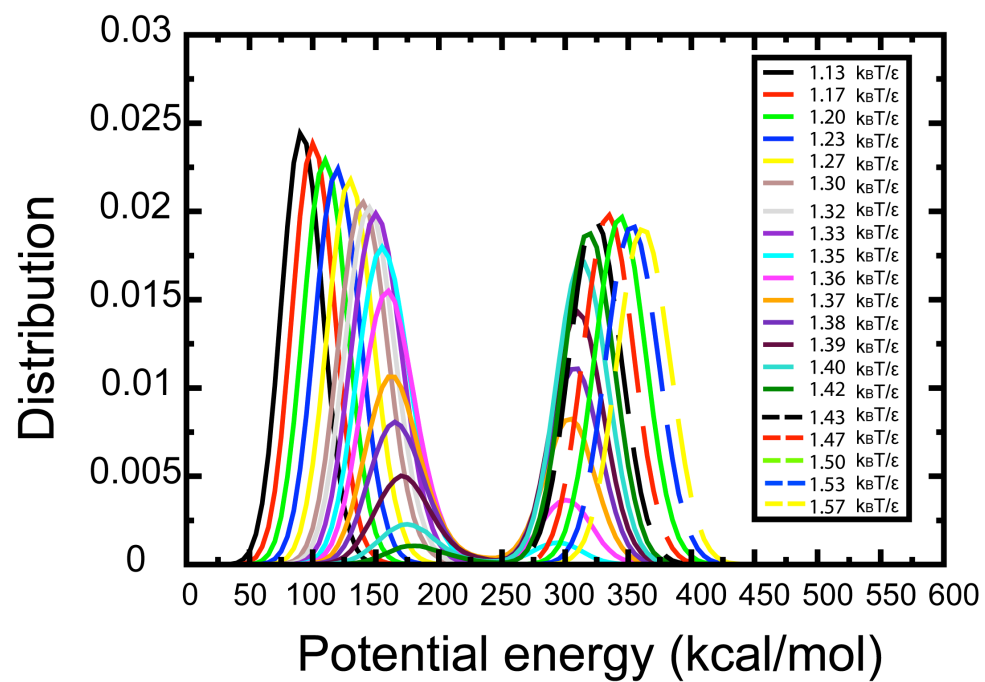

Figure S4. Illustration of all-atomistic structure (AA), PD model (PD) and HS model (HS) for three proteins: ribosome recycling factor (Frr); alkyl hydroperoxide reductase subunit C (AhpC) and phosphoglycerate kinase (PGK). Our test protein is apoazurin, which is showed both in new cartoon representation and a cyan bead. The radius of the cyan bead equals to the radius of gyration of apoazurin.

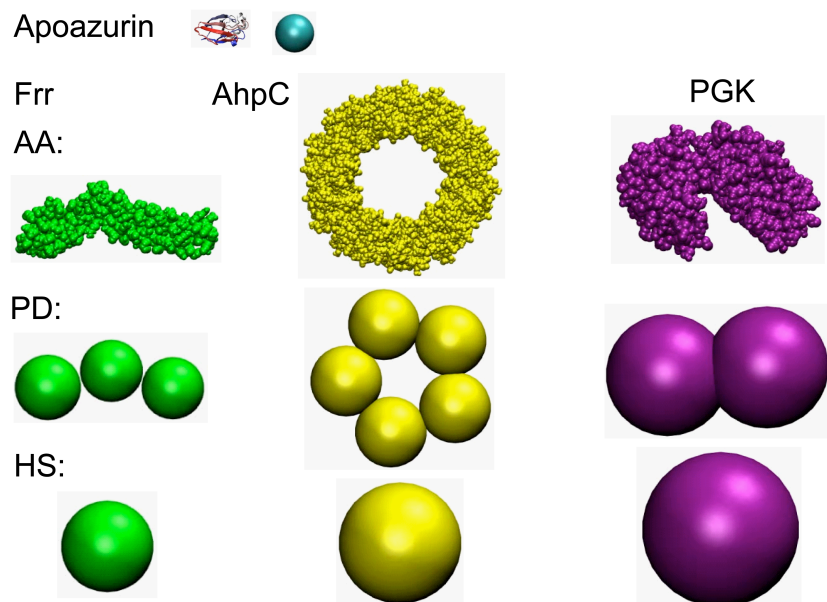

Supplement: mmc1.pdf [file mmc1.pdf]
